1

1 **Association between breastfeeding and DNA**  
2 **methylation over the life course: findings from the Avon**  
3 **Longitudinal Study of Parents and Children (ALSPAC)**

4

5 Fernando Pires Hartwig<sup>1,2\*</sup>; [fernandophartwig@gmail.com](mailto:fernandophartwig@gmail.com)

6 George Davey Smith<sup>2</sup>; [kz.davey-smith@bristol.ac.uk](mailto:kz.davey-smith@bristol.ac.uk)

7 Andrew J Simpkin<sup>2,3</sup>; [andrew.simpkin@bristol.ac.uk](mailto:andrew.simpkin@bristol.ac.uk)

8 Cesar Gomes Victora<sup>1</sup>; [cvictora@gmail.com](mailto:cvictora@gmail.com)

9 Caroline L. Relton<sup>2</sup>; [caroline.relton@bristol.ac.uk](mailto:caroline.relton@bristol.ac.uk)

10 Doretta Caramaschi<sup>2</sup>; [d.caramaschi@bristol.ac.uk](mailto:d.caramaschi@bristol.ac.uk)

11

12 <sup>1</sup>Postgraduate Programme in Epidemiology, Federal University of Pelotas, Pelotas,

13 Brazil

14 <sup>2</sup>MRC Integrative Epidemiology Unit, University of Bristol, Population Health Science,

15 Bristol Medical School, Bristol, United Kingdom.

16 <sup>3</sup>Insight Centre for Data Analytics, National University of Ireland, Galway, Ireland.

17

18 \*Corresponding author.

## 19 **Abstract**

20 **Background:** Breastfeeding is associated with short and long-term health benefits.  
21 Long-term effects might be mediated by epigenetic mechanisms, yet a recent  
22 systematic review indicated that the literature on this topic is scarce. We performed  
23 the first epigenome-wide association study of infant feeding, comparing breastfed vs  
24 non-breastfed children. We measured DNA methylation in children from peripheral  
25 blood collected in childhood (age 7, N=640) and adolescence (age 15-17, N=709) within  
26 the Accessible Resource for Integrated Epigenomic Studies (ARIES) project, part of the  
27 larger Avon Longitudinal Study of Parents and Children (ALSPAC) cohort. Cord blood  
28 methylation (N=702) was used as a negative control for potential pre-natal residual  
29 confounding.

30 **Results:** Two differentially-methylated sites presented directionally-consistent  
31 associations with breastfeeding at ages 7 and 15-17, but not at birth. Twelve  
32 differentially-methylated regions in relation to breastfeeding were identified, and for  
33 three of them there was evidence of directional concordance between ages 7 and 15-  
34 17, but not between birth and age 7.

35 **Conclusions:** Our findings indicate that DNA methylation in childhood and adolescence  
36 may be predicted by breastfeeding, but further studies with sufficiently large samples  
37 for replication are required to identify robust associations.

38  
39 **Keywords:** Breastfeeding; Life-course; DNA methylation; Epigenome-wide association  
40 study.

## 41 **Background**

42 Breastfeeding has clear short-term health benefits, particularly in reducing the risk of  
43 infections in childhood. Accumulating evidence indicates that breastfeeding may also  
44 have long-term effects on health outcomes and human capital, as well as benefit  
45 maternal health [1]. For example, being breastfed has been associated with better  
46 performance in intelligence quotient (IQ) tests in a meta-analysis based on a  
47 systematic literature review [2], in population-based birth cohorts with different  
48 confounding structures [3], and in the single large randomized controlled trial on this  
49 subject [4].

50 The mechanisms underlying the long-term effects of breastfeeding are not fully  
51 understood. Such mechanisms clearly must persist over time after weaning – in other  
52 words, become “imprinted” in the organism [5]. In the case of other early-life  
53 exposures such as maternal smoking during pregnancy, there is evidence of long-term  
54 associations with offspring DNA methylation [6] – i.e., addition of a methyl ( $-CH_3$ )  
55 group to DNA at the 5' position of a cytosine base, typically in cytosine-guanine (CpG)  
56 dinucleotides located in DNA sequences called CpG islands, which are rich in CpG  
57 dinucleotides [7, 8]. DNA methylation is one type of a broader class of biological  
58 processes known as epigenetics, which encompasses mitotically heritable events –  
59 other than changes in the DNA sequence itself – involved in gene expression  
60 regulation. Epigenetic processes play a key role in developmental processes [9, 10],  
61 and have more recently been linked to disease processes [11, 12, 13, 14], although  
62 causal claims have been overstated in many cases [15].

63 Some evidence suggests that breastfeeding might influence DNA methylation through  
64 the effects of some of its nutritional components [16] or through the microbiome,  
65 which is shaped by early feeding habits [17]. However, according to a recent  
66 systematic literature review [18], the overall evidence on the potential effects of  
67 breastfeeding on DNA methylation is scarce. Our aim was to perform a genome-wide  
68 assessment of the association between breastfeeding and DNA methylation in  
69 childhood, characterise – if present – the pattern of this association and investigate  
70 whether it persists until adolescence in a population-based study in England.

## 71 **Methods**

### 72 **Study setting and participants**

73 Study subjects were part of the Accessible Resource for Integrated Epigenomic Studies  
74 (ARIES) [19], a sub-sample of the Avon Longitudinal Study of Parents and Children  
75 (ALSPAC) for which methylation data were collected. ALSPAC is a population-based,  
76 prospective birth cohort of women and their children [20, 21, 22]. All pregnant women  
77 living in the geographical area of Avon (UK) with expected delivery date between 1  
78 April 1991 and 31 December 1992 were invited to participate. Approximately 85% of  
79 the eligible population was enrolled, totalling 14,541 pregnant women who gave  
80 informed and written consent. Information on the data collection and availability can  
81 be found at <http://www.bris.ac.uk/alspac/researchers/data-access/data-dictionary/>.  
82 Ethical approval for the study was obtained from the ALSPAC Ethics and Law  
83 Committee and the Local Research Ethics Committees.

84 Our analysis was focused on the offspring born in 1991-1992. The analyses were  
85 restricted to singletons or only to one participant out of a twin pair, selected at  
86 random. Individuals with missing information for the exposure, outcome or covariates  
87 (described below) were excluded.

## 88 **Study variables**

### 89 **DNA methylation**

90 DNA methylation in white blood cells was measured in ARIES offspring at three time  
91 points: at birth (cord blood), and at 7 and 15-17 years of age (peripheral blood). DNA  
92 samples underwent bisulphite conversion using the Zymo EZ DNA methylation™ kit  
93 (Zymo, Irvine, CA). The Illumina HumanMethylation450 BeadChip was used for  
94 genome-wide epigenotyping. The arrays were scanned using an Illumina iScan, and  
95 initial quality checks performed using GenomeStudio version 2011.1. We excluded  
96 single nucleotide polymorphisms, probes with a high detection P-value (ie, P-  
97 value>0.05 in more than 5% samples) and sex chromosomes. Methylation data  
98 normalisation was carried out using the “Tost” algorithm to minimise non-biological  
99 between-probe differences [23], as implemented in the “watermelon” R package [24].  
100 All processing steps used the “meffil” R package[25].

101 The outcome variables of this study were cord and peripheral blood (ages 7 and 15)  
102 DNA methylation levels in ~470,000 CpG sites. Methylation was analysed as beta  
103 values, which vary from 0 to 1 and indicate the proportion of cells methylated at a  
104 particular CpG [26]. Regression coefficients and standard errors were multiplied by

105 100, so that they can be interpreted as percent point differences in average DNA  
106 methylation at a given CpG site.

### 107 **Breastfeeding**

108 Breastfeeding data were collected through questionnaires answered by the mothers  
109 when their offspring were (on average) four weeks, six months and 15 months old, and  
110 combined into four different breastfeeding categorisations:

- 111 • A binary indicator of whether the individual was ever breastfed (regardless of  
112 duration).
- 113 • Breastfeeding duration groups, defined as follows: 0=never breastfed; 1=1 day to 3  
114 months of duration; 2=3.01 to 6 months; 3=6.01 to 12 months; and 4=more than 12  
115 months.
- 116 • Same as the above, but coding each category as a number and treating this as a  
117 continuous variable, thus assuming a linear trend per unit increase in duration  
118 category.
- 119 • Breastfeeding duration in months, as a continuous variable, thus assuming a linear  
120 trend per month increase in breastfeeding duration.

### 121 **Covariates**

122 Covariates were selected mostly based on a conceptual model encoded in the form of  
123 a directed acyclic graph (DAG) that we defined previously [18]. The following  
124 covariates were used:

- 125 • Sociodemographic: an indicator of whether the participant had white ethnic  
126 background (informed by mothers at 32 weeks of gestation), and the top two  
127 ancestry-informative principal components estimated using genome-wide  
128 genotyping data [27].
  
- 129 • Family socioeconomic position: to avoid collinearity issues, we used only the  
130 mother's highest educational qualification (informed by the mothers themselves at  
131 32 weeks of gestation).
  
- 132 • Maternal characteristics: parity (informed by the mothers at 18 weeks of gestation),  
133 height, pre-pregnancy weight (informed by the mothers themselves at 12 weeks of  
134 gestation), age at birth (calculated from mother's date of birth and date of delivery)  
135 and folic acid supplementation (informed by the mothers at 18 and 32 weeks of  
136 gestation).
  
- 137 • Gestational characteristics: maternal smoking during pregnancy (informed by the  
138 mothers at 18 weeks of gestation), type of delivery (informed by the mothers when  
139 their offspring were eight weeks old), gestational age (calculated from the date of  
140 the mother's last menstrual period reported at enrolment; when the mother was  
141 uncertain of this or when it conflicted with clinical assessment, the ultrasound  
142 assessment was used; where maternal report and ultrasound assessment  
143 conflicted, an experienced obstetrician reviewed clinical records and provided an  
144 estimate) and birthweight (from obstetric data, measures from the ALSPAC team  
145 and notifications or clinical records).

146 Although not included in the DAG, participant's sex and age at blood collection were  
147 also selected as covariates. Given that they are associated with DNA methylation but  
148 are not influenced by breastfeeding, adjusting for those two covariates may improve  
149 power by reducing variance in DNA methylation. We also adjusted for estimated cell  
150 counts using Bakulski's [28] (for cord blood) or Houseman's (for peripheral blood) [29]  
151 methods to account for methylation differences due to cell composition. Finally, a  
152 surrogate variable analysis was performed on the methylation data using the "sva" R  
153 package, and the surrogate variables not associated with breastfeeding were  
154 additionally included as covariates to adjust for batch effects [30].

## 155 **Statistical analyses**

156 We conducted an epigenome-wide association study (EWAS) of any reported  
157 breastfeeding (including mixed breast- and formula-feeding and in combination with  
158 other foods). The main EWAS analyses considered breastfeeding as the exposure in  
159 two categorisations: i) none vs. any; ii) duration categories, assuming a linear trend.  
160 We opted for this categorisation rather than the continuous breastfeeding variable  
161 because the latter is likely prone to substantial measurement error and digit  
162 preference in the self-reported months of duration. Moreover, assuming a linear effect  
163 over the entire range of breastfeeding duration (which entails assuming, for example  
164 that the effect of changing from 0 to 1 month is the same as the effect of changing  
165 from 15 to 16 months) seems less plausible than a linear trend over duration  
166 categories (which entails assuming, for example, that the effect of changing from 0-3  
167 to 3.01-6 months is the same as the effect of changing from 6.01-12 to >12 months).



168 The outcome was DNA methylation measured at ~470,000 CpG sites in peripheral  
169 blood at the age of 7 years. The association of methylation at CpGs at age 7 with  
170 suggestive evidence, here defined as achieving a P-value  $< 5.0 \times 10^{-6}$ , and breastfeeding  
171 was further analysed using additional categorisations of the exposure (breastfeeding).  
172 We also investigated whether the signal persisted over time by analysing the  
173 association of CpG methylation at age 15-17 and breastfeeding (ever vs never and  
174 duration categories). Cord blood methylation was analysed as a negative control [31],  
175 under the assumption that at least some of possible pre-natal residual confounding  
176 would result in associations between breastfeeding and cord blood methylation. Two  
177 analysis models were performed on the subjects with complete covariate data  
178 available (N=702): i) adjusting only for estimated cell composition and batch effects,  
179 and ii) adjusting for all covariates. These models are hereafter referred to as minimally-  
180 adjusted and fully-adjusted, respectively. All analyses were performed using  
181 heteroskedasticity-consistent standard errors, implemented using the “lmtest”,  
182 “MASS” and “sandwich” R packages.

183 The EWAS results were further used to identify differentially methylated regions  
184 (DMRs) in relation to breastfeeding. DMRs were identified using the Comb-P method,  
185 which tags regions enriched for low P-values while accounting for auto-correlation and  
186 multiple testing [32, 33]. Following the criteria used by Sharp et al. [34], a region was  
187 classified as a DMR if: i) it contained at least two CpGs; ii) all CpGs in the region are  
188 within 1000 bp of at least another CpG in the same region; and iii) the auto-correlation  
189 and multiple-testing corrected (upon applying Stouffer-Liptak-Kechris and Sidak  
190 methods, respectively) P-value for the region was  $< 0.05$ . The CpGs belonging to the  
191 identified DMRs were analysed further to assess if breastfeeding had a consistent

192 effect across the DMR (ie, if CpGs in the DMR generally presented greater or lower  
193 levels of methylation according to breastfeeding) using linear mixed models to account  
194 for the correlation between CpGs assuming that they are nested within individuals.  
195 Therefore, each CpG in a given DMR was treated as a repeated measure of DNA  
196 methylation, and the regression coefficient indicates the average difference in DNA  
197 methylation levels comparing breastfed and never breastfed individuals, averaging  
198 across all CpGs in the DMR. This was implemented using the “nlme” R package. This  
199 was complemented by evaluating, for each DMR, the directional consistency of each  
200 CpG across time points using a sign test. Analyses were performed using R 3.4 (R Core  
201 Team (2018). R: A language and environment for statistical computing. R Foundation  
202 for Statistical Computing, Vienna, Austria. URL <https://www.R-project.org>).

## 203 **Results**

### 204 **Description of study participants**

205 Supplementary Table 1 displays the characteristics of the study participants. There  
206 were 702 (birth), 640 (age 7) and 709 (age 15-17) individuals with non-missing  
207 information for all study variables (corresponding to approximately 70% of all ARIES  
208 participants). In general, the subset included in our analysis was similar to the entire  
209 ARIES dataset. The largest differences were observed for maternal education at birth  
210 (with the mothers of included individuals having slightly higher educational  
211 attainment) and ethnicity (with the proportion of individuals of white ethnic  
212 background being slightly higher in the included individuals). Previous analyses  
213 indicated that ARIES is reasonably representative of the entire ALSPAC cohort [19].

## 214 **Association of breastfeeding with single CpG sites**

215 Figures 1 and 2 provide an overall view of the EWAS results. There was no strong  
216 indication of genome-wide inflation for breastfeeding analysed in duration categories,  
217 assuming a linear trend (genomic inflation factor of 0.97), but there was some  
218 indication for the “ever breastfeeding” variable (genomic inflation factor of 1.10).  
219 Importantly, the bulk of the distribution closely resembled the expected under the  
220 null, with the deviation occurring in the right tail of the distribution of P-values. This  
221 may be due to breastfeeding having small effects on DNA methylation (in which case  
222 detection would require larger samples) in many regions of the genome, rather than  
223 due to the presence of systematic bias in the results.

224 Regarding ever breastfeeding, no CpGs achieved the conventional threshold of  
225  $FDR < 0.05$  (which approximately corresponds to a P-value of  $1.0 \times 10^{-7}$ ) in the minimally-  
226 adjusted model, although a few achieved  $FDR < 0.20$  (which approximately corresponds  
227 to a P-value of  $1.0 \times 10^{-6}$ ). In the fully-adjusted model (Table 1), one CpG (cg11414913)  
228 achieved  $FDR < 0.05$ , and there was suggestive evidence of association for six additional  
229 sites (cg00234095, cg04722177, cg03945777, cg17052885, cg05800082 and  
230 cg24134845; see Supplementary Table 2 for a description of those CpGs). The results  
231 for breastfeeding coded as a categorical variable in duration categories (assuming a  
232 linear trend) were null, with no CpGs achieving even suggestive levels of association.  
233 This suggests that, if breastfeeding is associated with peripheral blood DNA  
234 methylation, the association depends more on whether or not the individual was ever  
235 breastfed than breastfeeding duration.

236 Table 1 shows that methylation in the cg11414913 CpG was 3.2 percent points lower  
237 ( $P=5.2 \times 10^{-8}$ ) in ever breastfed children. There was also suggestive evidence for an  
238 association between breastfeeding and lower methylation in the cg00234095 ( $\beta=-1.7$ ;  
239  $P=4.9 \times 10^{-7}$ ), cg04722177 ( $\beta=-2.9$ ;  $2.7 \times 10^{-6}$ ), and cg03945777 ( $\beta=-0.8$ ;  $P=3.2 \times 10^{-6}$ ) sites,  
240 and for higher methylation in the cg17052885 ( $\beta=1.8$ ;  $P=4.9 \times 10^{-6}$ ), cg05800082 ( $\beta=1.1$ ;  
241  $P=5.8 \times 10^{-6}$ ), and cg24134845 ( $\beta=0.2$ ;  $P=3.3 \times 10^{-5}$ ) sites. The evidence of an association  
242 was greatly attenuated when breastfeeding was analysed continuously (in months),  
243 and the regression coefficients were generally similar among different categories of  
244 breastfeeding duration. Those results indicate that the association between  
245 breastfeeding and peripheral blood DNA methylation is unlikely to follow a dose-  
246 response relationship, but presents a threshold (ever vs. never) pattern.

247 Table 2 displays the association between ever breastfeeding and peripheral blood  
248 methylation at different ages in the CpGs identified in the EWAS. The cg11414913 CpG  
249 presented a persistent, directionally-consistent association with breastfeeding at the  
250 age of 15-17 years ( $\beta=-2.8$ ;  $P=0.004$ ), and no strong evidence of association at birth  
251 ( $\beta=-0.4$ ;  $P=0.631$ ). The cg05800082 CpG presented a similar pattern, although the point  
252 estimate was attenuated compared to age 7 years, and presented rather weak  
253 statistical evidence of association at the age of 15-17 years ( $\beta=0.6$ ;  $P=0.083$ ). However,  
254 it was reassuring that its point estimate at birth ( $\beta=-0.5$ ;  $P=0.144$ ) was directionally  
255 inconsistent with the results at later ages. The CpGs cg00234095, cg03945777 and  
256 cg24134845 presented evidence of association only at age 7, suggesting that their  
257 association with breastfeeding does not persist until the ages of 15-17. DNA  
258 methylation at birth in the two remaining CpGs was associated with breastfeeding in  
259 the same direction as the association at the age of 7, suggesting that those

260 associations are substantially influenced by some unaccounted bias source (e.g.,  
261 unmeasured confounders).

## 262 **Association between breastfeeding and methylation regions**

263 Given that quantile-quantile plots were suggestive of small effects of breastfeeding on  
264 DNA methylation in many regions of the genome, we complemented the ever  
265 breastfeeding EWAS with a search for differentially methylated regions (DMRs) – i.e.,  
266 two or more CpGs enriched for low P-values of the association with breastfeeding (see  
267 the Methods for details). 12 DMRs were identified at age 7 (Table 3 and  
268 Supplementary Table 3). There was no strong indication that the association of  
269 breastfeeding with different CpGs in the same DMR was generally directionally  
270 consistent (Table 3). However, regarding directional concordance for each CpG across  
271 time points, four DMRs presented evidence of concordance between 7 and 15-17  
272 years, but not between methylation and birth and at age 7: 18:106178-106850,  
273 9:91296-92146, 22:255590-256045, and 8:409905-410098 (Table 4). For two DMRs  
274 (5:97867-98797 and 1:425524-426297), there was evidence for directional  
275 concordance between birth and 7 years of age, suggesting that the associations  
276 between breastfeeding and methylation at age 7 in the CpGs in those DMRs may be  
277 distorted by pre-natal confounders. For the remaining six DMRs, there was no  
278 evidence for directional concordance between any of the two comparisons, suggesting  
279 that the association between breastfeeding and methylation at age 7 in the CpGs in  
280 those DMRs may be transient or false-positives. A sensitivity analysis considering only  
281 those CpGs that achieved  $P < 0.05$  in at least one time point corroborated the strongest  
282 directional consistency between 7 and 15-17 years observed for the four

283   aforementioned DMRs, except the 8:409905-410098; importantly, this analysis  
284   involved only 3 CpGs for this DMR (Supplementary Table 4). Moreover, a fifth DMR –  
285   19:365914-366989 – was identified in this analysis, suggesting that CpGs with weak  
286   associations could have diluted the association in the analysis considering all CpGs in  
287   the DMR.

## 288   **Discussion**

289   In this epigenome-wide association study, having ever been breastfed was associated  
290   with peripheral blood methylation in the cg11414913 CpG at ages 7 and 15-17 years,  
291   but not at birth. There was suggestive evidence of association between ever been  
292   breastfed and age 7 methylation in six additional CpGs, with one – the cg05800082  
293   CpG – also presenting a directionally consistent (although attenuated) point estimate  
294   at age 15, but not at birth. Moreover, 12 DMRs were identified at age 7, and three of  
295   them presented evidence of directional concordance between ages 7 and 15-17, but  
296   not between birth and age 7, in all sensitivity analyses. Our quantile-quantile plots  
297   indicated that the associational effect estimates between ever breastfeeding and  
298   peripheral blood DNA methylation are generally small. None of our analyses supported  
299   a dose-response relationship between breastfeeding and peripheral blood DNA  
300   methylation, but were consistent with an effect that depends on whether or not the  
301   child was ever breastfed.

302   The epidemiological literature on breastfeeding and health focuses on well-established  
303   effects against infectious diseases, as well as on potential impact on intelligence,  
304   obesity and diabetes, among other outcomes [1]. In the present analyses, only one site

305 where methylation differences were detected could be involved in the above traits.  
306 Specifically, an online search into the biological role of the genes whose methylation  
307 was associated with breastfeeding (see Supplementary info) showed an effect on the  
308 *DST* gene, which is expressed in many tissues, including the brain, where it encodes  
309 isoforms of cytoskeletal linker proteins anchor neural intermediate filaments to the  
310 actin cytoskeleton. Other sites affected were not located on genes with known  
311 function or were in genes expressed in other tissues such as testis. This may be due to  
312 analysing a surrogate tissue, limited statistical power to detect more CpGs, and limited  
313 knowledge about the health effects of the methylation sites that were detected.  
314 Moreover, the effects of breastfeeding on health and development may be mediated  
315 through other epigenetic processes, such as non-coding RNAs [35, 36], as well as a host  
316 of mechanisms other than epigenetics, including provision of nutrients (e.g., pre-  
317 formed long-chain polyunsaturated fatty acids, which is a plausible mediator of the  
318 benefits on IQ [37]), antibodies and other immunoactive compounds, antimicrobials,  
319 and important effects on the gut microbiome [1].

320 One of the strengths of this study is that longitudinal measures of DNA methylation  
321 allowed not only identifying regions of the methylome associated with breastfeeding,  
322 but also assessing if those associations persist until adolescence. Dense phenotyping  
323 and genotyping of study participants allowed controlling for several covariates, which  
324 were selected using a conceptual model defined *a priori*. Moreover, DNA methylation  
325 data at birth was used to rule out associations likely driven by residual confounding  
326 due to pre-natal factors. To unravel the possibility of residual confounding by maternal  
327 smoking, we checked the overlap between the suggestive CpG sites from our  
328 breastfeeding EWAS and the largest maternal smoking EWAS [38], and found that

329 none of the sites were amongst the 6073 sites that were associated with maternal  
330 smoking during pregnancy, suggesting that it is unlikely that the associations were  
331 driven by residual confounding by maternal smoking. However, residual confounding  
332 cannot be fully discarded due to missing confounders (including post-birth factors that  
333 may affect breastfeeding quality and duration) measurement error and model  
334 misspecification. Therefore, triangulating our findings with those from future studies  
335 using designs prone to different potential sources of bias will be important to  
336 disentangle causality [39].

337 In addition to the possibility of residual confounding, another weakness of our study is  
338 that our exposure variable was ill-defined. Due to sample size constraints and  
339 limitations of self-reported data, it was not possible to use more refined definitions of  
340 breastfeeding. Indeed, our main results were related to the binary categorisation,  
341 which includes, in the “breastfed” group, highly heterogeneous individuals regarding  
342 breastfeeding quality, duration, type of foods given concurrently with breastmilk (for  
343 individuals that were non-exclusively breastfeed) and after weaning, among other  
344 factors. Similarly, the “non-breastfed” group potentially includes individuals that  
345 received many different types of foods. This heterogeneity is likely to influence the  
346 results in ways that are rather difficult to predict, and limits the external validity of our  
347 findings.

348 It should also be noted that our study was restricted to peripheral blood. As we  
349 discussed elsewhere [18], DNA methylation in blood is unlikely to be a good proxy of  
350 DNA methylation in other tissues, such as the brain [40, 41, 42], thus limiting the  
351 capacity of any breastfeeding EWAS using peripheral blood to inform DNA methylation



352 patterns in the target tissue [11, 43] – in this example, when assessing if the  
353 association between breastfeeding and IQ has a component related to methylation.  
354 This may also limit the capacity to identify true signals. However, DNA methylation  
355 studies in surrogate tissues are important. These are frequently the only viable  
356 alternative in large epidemiological studies, also being able to provide useful  
357 information on the range of potential effects of the exposure of interest on DNA  
358 methylation, which may then guide future, specific studies such as *in vitro* studies in  
359 cells and *in vivo* studies in animal models [18].

360 Another important limitation is that we did not perform a formal replication of our  
361 results. However, the fact that some hits (both in the CpG and DMR analysis) at age 7  
362 years did not present evidence of association at age 15-17 years indicates that inflation  
363 of type-I error due to multiple-testing alone was not sufficient for a hit in one age to  
364 also present evidence of association in other ages. Therefore, CpGs and DMRs that  
365 presented evidence of persistent associations are less likely to be a sole product of  
366 multiple testing. However, this reasoning is less clear for transient associations, which  
367 could be truly transient effects or merely false-positives that do not carry over to  
368 adolescence. Although persistent associations are likely to be more robust from a  
369 methodological perspective in our study, this does not mean that transient effects are  
370 irrelevant. For example, they could trigger the actual processes related to long-term  
371 effects (e.g., influences on brain development and IQ in adulthood). Moreover, in our  
372 context transient effects mean that associations observed at the age of 7 years did not  
373 persist until adolescence, but associations at age 7 would already be persistent effects  
374 of breastfeeding. Finally, it is important to consider the loss of individuals to missing  
375 data. About 30% of ARIES data were removed due to missing exposure, covariate or

376 outcome data, which reduces the power to find CpG sites related to breastfeeding.  
377 Methods for multiple imputation in methylation data [44] are at an early stage and  
378 therefore were not used here, but in future these methods will be crucial to maximise  
379 the power of an EWAS.

## 380 **Conclusions**

381 This study provides important insights into the magnitude and persistence of the  
382 association between breastfeeding and peripheral blood DNA methylation. Rather  
383 than providing definitive answers on their own, our results will serve to motivate  
384 future studies using different designs to improve causal inference, as well as  
385 consortium-based efforts – examples of which are already available in the epigenetic  
386 epidemiology literature [38, 45] – to achieve sample sizes large enough to both  
387 improve power and allow replication. Such future efforts will complement and expand  
388 our findings by providing robust evidence on the potential effects of breastfeeding on  
389 DNA methylation, which may contribute to understand the biological basis of long-  
390 term associations between breastfeeding and health and human capital outcomes, and  
391 potentially also reveal new biological aspects of breastfeeding.

## 392 **List of abbreviations**

393 ALSPAC: Avon Longitudinal Study of Parents and Children.

394 ARIES: Accessible Resource for Integrated Epigenomic Studies.

395 DAG: directed acyclic graph.

396 DMR: differentially methylated region.

397 DNA: deoxyribonucleic acid.

398 EWAS: epigenome-wide association study.

399 IQ: intelligence quotient.

## 400 **Declarations**

### 401 **Ethics approval and consent to participate**

402 Only individuals who gave informed and written consent were enrolled in ALSPAC. Ethical  
403 approval for the study was obtained from the ALSPAC Ethics and Law Committee and the Local  
404 Research Ethics Committees.

### 405 **Consent for publication**

406 Not applicable.

### 407 **Availability of data and material**

408 The datasets analysed during the current study are not publicly available due to them  
409 containing information that could compromise research participant privacy/consent, but they  
410 are available on request to the Executive ([alspac-exec@bristol.ac.uk](mailto:alspac-exec@bristol.ac.uk)).

### 411 **Competing interests**

412 This publication is the work of the authors and Fernando Pires Hartwig and Doretta  
413 Caramaschi will serve as guarantors for the contents of this paper. No funding body  
414 has influenced data collection, analysis, or interpretation. The authors declare no  
415 conflicts of interest.

## 416 **Funding**

417 This work was coordinated by researchers working within the Medical Research  
418 Council (MRC) Integrative Epidemiology Unit, which is funded by the MRC and the  
419 University of Bristol (grant ref: MC\_UU\_00011/1, MC\_UU\_00011/5). FPH is supported  
420 by a Brazilian National Council for Scientific and Technological Development (CNPq)  
421 postdoctoral fellowship. The UK MRC and Wellcome (grant ref: 102215/2/13/2) and  
422 the University of Bristol provide core support for ALSPAC. GWAS data were generated  
423 by Sample Logistics and Genotyping Facilities at Wellcome Sanger Institute and  
424 LabCorp (Laboratory Corporation of America) using support from 23 and me.

## 425 **Authors' contributions**

426 Study conception and design: CGV, CR, DC, FPH and GDS.

427 Data acquisition: CR and GDS.

428 Data analysis and interpretation: AJS, DC and FPH.

429 Manuscript writing: DC and FPH.

430 Critical revision of the manuscript: AJS, CGV, CR, GDS.

431 All authors read and approved the final manuscript.

## 432 **Acknowledgements**

433 We are extremely grateful to all the families who took part in this study, the midwives  
434 for their help in recruiting them, and the whole ALSPAC team, which includes

435 interviewers, computer and laboratory technicians, clerical workers, research  
436 scientists, volunteers, managers, receptionists, and nurses.

## 437 **References**

- 438 1. Victora, CG, Bahl, R, Barros, AJ, Franca, GV, Horton, S, Krasevec, J et al. Breastfeeding in  
439 the 21st century: epidemiology, mechanisms, and lifelong effect. *Lancet*. 2016; 387:475-  
440 90.
- 441 2. Horta, BL, Gigante, DP, Goncalves, H, dos Santos Motta, J, Loret de Mola, C, Oliveira, IO et  
442 al. Cohort Profile Update: The 1982 Pelotas (Brazil) Birth Cohort Study. *Int J Epidemiol*.  
443 2015; 44:441, a-e.
- 444 3. Brion, MJ, Lawlor, DA, Matijasevich, A, Horta, B, Anselmi, L, Araujo, CL et al. What are the  
445 causal effects of breastfeeding on IQ, obesity and blood pressure? Evidence from  
446 comparing high-income with middle-income cohorts. *Int J Epidemiol*. 2011; 40:670-80.
- 447 4. Kramer, MS, Aboud, F, Mironova, E, Vanilovich, I, Platt, RW, Matush, L et al. Breastfeeding  
448 and child cognitive development: new evidence from a large randomized trial. *Arch Gen*  
449 *Psychiatry*. 2008; 65:578-84.
- 450 5. Relton, CL, Hartwig, FP & Davey Smith, G. From stem cells to the law courts: DNA  
451 methylation, the forensic epigenome and the possibility of a biosocial archive. *Int J*  
452 *Epidemiol*. 2015; 44:1083-93.
- 453 6. Richmond, RC, Simpkin, AJ, Woodward, G, Gaunt, TR, Lyttleton, O, McArdle, WL et al.  
454 Prenatal exposure to maternal smoking and offspring DNA methylation across the  
455 lifecourse: findings from the Avon Longitudinal Study of Parents and Children (ALSPAC).  
456 *Hum Mol Genet*. 2015; 24:2201-17.

- 457 7. Han, L, Su, B, Li, WH & Zhao, Z. CpG island density and its correlations with genomic  
458 features in mammalian genomes. *Genome Biol.* 2008; 9:R79.
- 459 8. Rakyan, VK, Down, TA, Balding, DJ & Beck, S. Epigenome-wide association studies for  
460 common human diseases. *Nat Rev Genet.* 2011; 12:529-41.
- 461 9. Kiefer, JC. Epigenetics in development. *Dev Dyn.* 2007; 236:1144-56.
- 462 10. Huang, K & Fan, G. DNA methylation in cell differentiation and reprogramming: an  
463 emerging systematic view. *Regen Med.* 2010; 5:531-44.
- 464 11. Relton, CL & Davey Smith, G. Epigenetic epidemiology of common complex disease:  
465 prospects for prediction, prevention, and treatment. *PLoS Med.* 2010; 7:e1000356.
- 466 12. Tollefsbol, T. *Epigenetics in Human Disease.* (Academic Press, 2012).
- 467 13. Kaelin, WG, Jr. & McKnight, SL. Influence of metabolism on epigenetics and disease. *Cell.*  
468 2013; 153:56-69.
- 469 14. Tobi, EW, Slieker, RC, Luijk, R, Dekkers, KF, Stein, AD, Xu, KM et al. DNA methylation as a  
470 mediator of the association between prenatal adversity and risk factors for metabolic  
471 disease in adulthood. *Sci Adv.* 2018; 4:eao4364.
- 472 15. Richmond, R, Relton, C & Davey Smith, G. What evidence is required to suggest that DNA  
473 methylation mediates the association between prenatal famine exposure and adulthood  
474 disease? *Sci Adv.* 2018; 4:eao4364.
- 475 16. Verduci, E, Banderali, G, Barberi, S, Radaelli, G, Lops, A, Betti, F et al. Epigenetic effects of  
476 human breast milk. *Nutrients.* 2014; 6:1711-24.

- 477 17. Mischke, M & Plosch, T. More than just a gut instinct-the potential interplay between a  
478 baby's nutrition, its gut microbiome, and the epigenome. *Am J Physiol Regul Integr Comp*  
479 *Physiol.* 2013; 304:R1065-9.
- 480 18. Hartwig, FP, Loret de Mola, C, Davies, NM, Victora, CG & Relton, CL. Breastfeeding effects  
481 on DNA methylation in the offspring: A systematic literature review. *PLoS One.* 2017;  
482 12:e0173070.
- 483 19. Relton, CL, Gaunt, T, McArdle, W, Ho, K, Duggirala, A, Shihab, H et al. Data Resource  
484 Profile: Accessible Resource for Integrated Epigenomic Studies (ARIES). *Int J Epidemiol.*  
485 2015; 44:1181-90.
- 486 20. Golding, J, Pembrey, M & Jones, R. ALSPAC--the Avon Longitudinal Study of Parents and  
487 Children. I. Study methodology. *Paediatr Perinat Epidemiol.* 2001; 15:74-87.
- 488 21. Boyd, A, Golding, J, Macleod, J, Lawlor, DA, Fraser, A, Henderson, J et al. Cohort Profile:  
489 the 'children of the 90s'--the index offspring of the Avon Longitudinal Study of Parents  
490 and Children. *Int J Epidemiol.* 2013; 42:111-27.
- 491 22. Fraser, A, Macdonald-Wallis, C, Tilling, K, Boyd, A, Golding, J, Davey Smith, G et al. Cohort  
492 Profile: the Avon Longitudinal Study of Parents and Children: ALSPAC mothers cohort. *Int J*  
493 *Epidemiol.* 2013; 42:97-110.
- 494 23. Touleimat, N & Tost, J. Complete pipeline for Infinium((R)) Human Methylation 450K  
495 BeadChip data processing using subset quantile normalization for accurate DNA  
496 methylation estimation. *Epigenomics.* 2012; 4:325-41.
- 497 24. Pidsley, R, CC, YW, Volta, M, Lunnon, K, Mill, J & Schalkwyk, LC. A data-driven approach to  
498 preprocessing Illumina 450K methylation array data. *BMC Genomics.* 2013; 14:293.

- 499 25. Min, J, Hemani, G, Davey Smith, G, Relton, CL & Suderman, M. Meffil: efficient  
500 normalisation and analysis of very large DNA methylation samples. bioRxiv:  
501 10.1101/125963. 2017.
- 502 26. Du, P, Zhang, X, Huang, CC, Jafari, N, Kibbe, WA, Hou, L et al. Comparison of Beta-value  
503 and M-value methods for quantifying methylation levels by microarray analysis. BMC  
504 Bioinformatics. 2010; 11:587.
- 505 27. Price, AL, Patterson, NJ, Plenge, RM, Weinblatt, ME, Shadick, NA & Reich, D. Principal  
506 components analysis corrects for stratification in genome-wide association studies. Nat  
507 Genet. 2006; 38:904-9.
- 508 28. Bakulski, KM, Feinberg, JI, Andrews, SV, Yang, J, Brown, S, S, LM et al. DNA methylation of  
509 cord blood cell types: Applications for mixed cell birth studies. Epigenetics. 2016; 11:354-  
510 62.
- 511 29. Houseman, EA, Accomando, WP, Koestler, DC, Christensen, BC, Marsit, CJ, Nelson, HH et  
512 al. DNA methylation arrays as surrogate measures of cell mixture distribution. BMC  
513 Bioinformatics. 2012; 13:86.
- 514 30. Leek, JT & Storey, JD. Capturing heterogeneity in gene expression studies by surrogate  
515 variable analysis. PLoS Genet. 2007; 3:1724-35.
- 516 31. Smith, GD. Assessing intrauterine influences on offspring health outcomes: can  
517 epidemiological studies yield robust findings? Basic Clin Pharmacol Toxicol. 2008;  
518 102:245-56.
- 519 32. Pedersen, BS, Schwartz, DA, Yang, IV & Kechris, KJ. Comb-p: software for combining,  
520 analyzing, grouping and correcting spatially correlated P-values. Bioinformatics. 2012;  
521 28:2986-8.



- 522 33. Jaffe, AE, Murakami, P, Lee, H, Leek, JT, Fallin, MD, Feinberg, AP et al. Bump hunting to  
523 identify differentially methylated regions in epigenetic epidemiology studies. *Int J*  
524 *Epidemiol.* 2012; 41:200-9.
- 525 34. Sharp, GC, Ho, K, Davies, A, Stergiakouli, E, Humphries, K, McArdle, W et al. Distinct DNA  
526 methylation profiles in subtypes of orofacial cleft. *Clin Epigenetics.* 2017; 9:63.
- 527 35. Karlsson, O, Rodosthenous, RS, Jara, C, Brennan, KJ, Wright, RO, Baccarelli, AA et al.  
528 Detection of long non-coding RNAs in human breastmilk extracellular vesicles:  
529 Implications for early child development. *Epigenetics.* 2016; 0.
- 530 36. Alsaweed, M, Hartmann, PE, Geddes, DT & Kakulas, F. MicroRNAs in Breastmilk and the  
531 Lactating Breast: Potential Immunoprotectors and Developmental Regulators for the  
532 Infant and the Mother. *Int J Environ Res Public Health.* 2015; 12:13981-4020.
- 533 37. Innis, SM. Dietary (n-3) fatty acids and brain development. *J Nutr.* 2007; 137:855-9.
- 534 38. Joubert, BR, Felix, JF, Yousefi, P, Bakulski, KM, Just, AC, Breton, C et al. DNA Methylation in  
535 Newborns and Maternal Smoking in Pregnancy: Genome-wide Consortium Meta-analysis.  
536 *Am J Hum Genet.* 2016; 98:680-96.
- 537 39. Lawlor, DA, Tilling, K & Davey Smith, G. Triangulation in aetiological epidemiology. *Int J*  
538 *Epidemiol.* 2016; 45:1866-86.
- 539 40. Davies, MN, Volta, M, Pidsley, R, Lunnon, K, Dixit, A, Lovestone, S et al. Functional  
540 annotation of the human brain methylome identifies tissue-specific epigenetic variation  
541 across brain and blood. *Genome Biol.* 2012; 13:R43.
- 542 41. Walton, E, Hass, J, Liu, J, Roffman, JL, Bernardoni, F, Roessner, V et al. Correspondence of  
543 DNA Methylation Between Blood and Brain Tissue and Its Application to Schizophrenia  
544 Research. *Schizophr Bull.* 2016; 42:406-14.

- 545 42. Hannon, E, Lunnon, K, Schalkwyk, L & Mill, J. Interindividual methylomic variation across  
546 blood, cortex, and cerebellum: implications for epigenetic studies of neurological and  
547 neuropsychiatric phenotypes. *Epigenetics*. 2015; 10:1024-32.
- 548 43. Heijmans, BT & Mill, J. Commentary: The seven plagues of epigenetic epidemiology. *Int J*  
549 *Epidemiol*. 2012; 41:74-8.
- 550 44. Wu, C, Demerath, EW, Pankow, JS, Bressler, J, Fornage, M, Grove, ML et al. Imputation of  
551 missing covariate values in epigenome-wide analysis of DNA methylation data.  
552 *Epigenetics*. 2016; 11:132-9.
- 553 45. Gruzieva, O, Xu, CJ, Breton, CV, Annesi-Maesano, I, Anto, JM, Auffray, C et al. Epigenome-  
554 Wide Meta-Analysis of Methylation in Children Related to Prenatal NO<sub>2</sub> Air Pollution  
555 Exposure. *Environ Health Perspect*. 2017; 125:104-10.

556

## Tables

**Table 1.** Average percent point differences ( $\beta$ ) in DNA methylation at age 7 (N=640) according to breastfeeding.

| Breastfeeding                     | Statistic    | CpG                  |                      |                      |                      |                      |                      |                      |
|-----------------------------------|--------------|----------------------|----------------------|----------------------|----------------------|----------------------|----------------------|----------------------|
|                                   |              | cg11414913           | cg00234095           | cg04722177           | cg03945777           | cg17052885           | cg05800082           | cg24134845           |
| <b>Binary (ever vs. never)</b>    | P-value      | $5.2 \times 10^{-8}$ | $4.9 \times 10^{-7}$ | $2.7 \times 10^{-6}$ | $3.2 \times 10^{-6}$ | $4.9 \times 10^{-6}$ | $5.8 \times 10^{-6}$ | $3.3 \times 10^{-5}$ |
|                                   | $\beta$ (SE) | -3.19 (0.59)         | -1.74 (0.35)         | -2.90 (0.62)         | -0.84 (0.18)         | 1.79 (0.39)          | 1.05 (0.23)          | 0.23 (0.06)          |
| <b>Categories</b>                 | P-value      | -                    | -                    | -                    | -                    | -                    | -                    | -                    |
|                                   | $\beta$ (SE) | 0 (Ref.)             | 0 (Ref.)             | 0 (Ref.)             | 0 (Ref.)             | 0 (Ref.)             | 0 (Ref.)             | 0 (Ref.)             |
| 0                                 | P-value      | $1.5 \times 10^{-6}$ | $1.2 \times 10^{-7}$ | $5.3 \times 10^{-4}$ | $2.9 \times 10^{-5}$ | $8.2 \times 10^{-6}$ | $1.7 \times 10^{-6}$ | $6.8 \times 10^{-5}$ |
|                                   | $\beta$ (SE) | -3.19 (0.66)         | -2.02 (0.38)         | -2.45 (0.71)         | -0.85 (0.20)         | 1.85 (0.41)          | 1.19 (0.25)          | 0.25 (0.06)          |
| 0.01-3 months                     | P-value      | $5.4 \times 10^{-7}$ | $3.3 \times 10^{-5}$ | $5.8 \times 10^{-5}$ | 0.005                | $6.8 \times 10^{-5}$ | $6.4 \times 10^{-4}$ | 0.011                |
|                                   | $\beta$ (SE) | -3.50 (0.70)         | -1.88 (0.45)         | -3.22 (0.80)         | -0.66 (0.23)         | 1.85 (0.47)          | 0.94 (0.28)          | 0.17 (0.07)          |
| 3.01-6 months                     | P-value      | $2.5 \times 10^{-5}$ | $3.2 \times 10^{-4}$ | $5.9 \times 10^{-5}$ | $7.4 \times 10^{-5}$ | $6.1 \times 10^{-6}$ | 0.001                | $2.2 \times 10^{-4}$ |
|                                   | $\beta$ (SE) | -3.00 (0.71)         | -1.59 (0.44)         | -3.05 (0.76)         | -0.90 (0.23)         | 2.02 (0.45)          | 0.87 (0.27)          | 0.24 (0.06)          |
| 6.01-12 months                    | P-value      | $5.8 \times 10^{-4}$ | 0.037                | $1.1 \times 10^{-6}$ | $1.2 \times 10^{-4}$ | 0.008                | 0.001                | $4.4 \times 10^{-4}$ |
|                                   | $\beta$ (SE) | -2.96 (0.86)         | -0.93 (0.44)         | -3.79 (0.78)         | -0.99 (0.26)         | 1.29 (0.49)          | 1.04 (0.31)          | 0.25 (0.07)          |
| <b>&gt;12 months</b>              | P-value      | 0.036                | 0.832                | $1.7 \times 10^{-4}$ | 0.007                | 0.067                | 0.230                | 0.020                |
|                                   | $\beta$ (SE) | -0.42 (0.20)         | -0.02 (0.11)         | -0.70 (0.19)         | -0.16 (0.06)         | 0.19 (0.10)          | 0.08 (0.07)          | 0.04 (0.02)          |
| <b>Linear trend of categories</b> | P-value      | 0.080                | 0.766                | $2.5 \times 10^{-4}$ | 0.035                | 0.966                | 0.399                | 0.289                |
|                                   | $\beta$ (SE) | -0.09 (0.05)         | 0.01 (0.03)          | -0.18 (0.05)         | -0.03 (0.02)         | 0.00 (0.03)          | 0.01 (0.02)          | 0.00 (0.00)          |

SE: standard error.

**Table 2.** Average percent point differences ( $\beta$ ) in DNA methylation at different ages according to breastfeeding.

| CpG        | Time point          | $\beta$ | SE   | P-value              |
|------------|---------------------|---------|------|----------------------|
| cg11414913 | At birth (N=702)    | -0.44   | 0.91 | 0.631                |
|            | 7 years (N=640)     | -3.19   | 0.59 | $5.2 \times 10^{-8}$ |
|            | 15-17 years (N=709) | -2.47   | 0.85 | 0.004                |
| cg00234095 | At birth (N=702)    | 0.59    | 0.57 | 0.296                |
|            | 7 years (N=640)     | -1.74   | 0.35 | $4.9 \times 10^{-7}$ |
|            | 15-17 years (N=709) | 0.29    | 0.43 | 0.505                |
| cg04722177 | At birth (N=702)    | -1.50   | 0.70 | 0.032                |
|            | 7 years (N=640)     | -2.90   | 0.62 | $2.7 \times 10^{-6}$ |
|            | 15-17 years (N=709) | -1.05   | 0.78 | 0.180                |
| cg03945777 | At birth (N=702)    | 0.42    | 0.3  | 0.158                |
|            | 7 years (N=640)     | -0.84   | 0.18 | $3.2 \times 10^{-6}$ |
|            | 15-17 years (N=709) | 0.10    | 0.29 | 0.742                |
| cg17052885 | At birth (N=702)    | 1.32    | 0.57 | 0.022                |
|            | 7 years (N=640)     | 1.79    | 0.39 | $4.9 \times 10^{-6}$ |
|            | 15-17 years (N=709) | -0.29   | 0.47 | 0.547                |
| cg05800082 | At birth (N=702)    | -0.53   | 0.36 | 0.144                |
|            | 7 years (N=640)     | 1.05    | 0.23 | $5.8 \times 10^{-6}$ |
|            | 15-17 years (N=709) | 0.56    | 0.32 | 0.083                |
| cg24134845 | At birth (N=702)    | 0.04    | 0.07 | 0.535                |
|            | 7 years (N=640)     | 0.23    | 0.06 | $3.3 \times 10^{-5}$ |
|            | 15-17 years (N=709) | 0.00    | 0.08 | 0.991                |

SE: standard error.

**Table 3.** Association between peripheral blood DNA methylation at different ages at each DMR and ever breastfeeding.

| DMR<br>(Chr:Start-End <sup>a</sup> ) | At birth |      |         | 7 years |      |         | 15-17 years |      |         |
|--------------------------------------|----------|------|---------|---------|------|---------|-------------|------|---------|
|                                      | $\beta$  | SE   | P-value | $\beta$ | SE   | P-value | $\beta$     | SE   | P-value |
| 5:97,867-98,797                      | 0.30     | 0.21 | 0.146   | 0.43    | 0.21 | 0.043   | 0.30        | 0.21 | 0.158   |
| 19:365,914-366,989                   | -0.01    | 0.34 | 0.975   | 0.05    | 0.34 | 0.881   | -0.04       | 0.35 | 0.897   |
| 18:106,178-106,850                   | -0.08    | 0.77 | 0.913   | 0.14    | 0.75 | 0.855   | 0.23        | 0.77 | 0.767   |
| 1:425,524-426,297                    | 0.26     | 0.62 | 0.673   | 0.33    | 0.61 | 0.590   | 0.16        | 0.62 | 0.800   |
| 9:91,296-92,146                      | -0.10    | 0.33 | 0.759   | -0.18   | 0.33 | 0.578   | -0.10       | 0.34 | 0.755   |
| 17:222,498-222,991                   | -0.01    | 0.37 | 0.983   | 0.00    | 0.36 | 0.994   | -0.04       | 0.36 | 0.913   |
| 4:136,643-137,027                    | -0.03    | 0.41 | 0.951   | -0.37   | 0.38 | 0.324   | -0.31       | 0.41 | 0.448   |
| 22:255,590-256,045                   | 0.40     | 0.71 | 0.577   | 1.18    | 0.70 | 0.095   | 1.06        | 0.71 | 0.136   |
| 4:33,482-33,808                      | 0.13     | 2.05 | 0.950   | 0.06    | 2.00 | 0.978   | 0.08        | 2.04 | 0.967   |
| 8:409,905-410,098                    | 0.82     | 1.31 | 0.530   | 1.05    | 1.32 | 0.425   | 1.04        | 1.32 | 0.433   |
| 1:224,191-225,190                    | 0.03     | 0.45 | 0.940   | -0.03   | 0.44 | 0.951   | -0.03       | 0.45 | 0.948   |
| 9:61,093-61,964                      | -0.39    | 0.50 | 0.432   | -0.44   | 0.49 | 0.369   | -0.39       | 0.50 | 0.435   |

Regression coefficients ( $\beta$ ) are average percent point differences in DNA methylation averaged across CpGs that belong to the DMR. This analysis was performed using linear mixed models to account for the correlation between CpGs in the same DMR.

<sup>a</sup>Human Genome Assembly GRCh37.

Chr: Chromosome. DMR: differentially methylated region. SE: standard error.

**Table 4.** Directional concordance between time points for each individual CpG belonging to the same DMR.

| DMR<br>(Chr:Start-End <sup>a</sup> ) | Number<br>of CpGs | At birth and 7 years |                      | 7 years and 15-17 years |                       |
|--------------------------------------|-------------------|----------------------|----------------------|-------------------------|-----------------------|
|                                      |                   | Concordance          | P-value              | Concordance             | P-value               |
| 5:97,867-98,797                      | 275               | 66.2                 | 8.7×10 <sup>-8</sup> | 69.1                    | 2.2×10 <sup>-10</sup> |
| 19:365,914-366,989                   | 205               | 47.8                 | 0.576                | 54.1                    | 0.264                 |
| 18:106,178-106,850                   | 18                | 72.2                 | 0.096                | 83.3                    | 0.008                 |
| 1:425,524-426,297                    | 64                | 68.8                 | 0.004                | 56.3                    | 0.382                 |
| 9:91,296-92,146                      | 185               | 54.1                 | 0.303                | 58.4                    | 0.027                 |
| 17:222,498-222,991                   | 140               | 55.7                 | 0.205                | 49.3                    | 0.933                 |
| 4:136,643-137,027                    | 13                | 69.2                 | 0.267                | 61.5                    | 0.581                 |
| 22:255,590-256,045                   | 30                | 63.3                 | 0.200                | 83.3                    | 3.3×10 <sup>-4</sup>  |
| 4:33,482-33,808                      | 5                 | 60.0                 | 0.999                | 60.0                    | 0.999                 |
| 8:409,905-410,098                    | 7                 | 85.7                 | 0.125                | 100.0                   | 0.016                 |
| 1:224,191-225,190                    | 129               | 57.4                 | 0.113                | 47.3                    | 0.597                 |
| 9:61,093-61,964                      | 91                | 57.1                 | 0.208                | 56.0                    | 0.294                 |

Concordance is shown in %. The analyses were performed using a sign test.

<sup>a</sup>Human Genome Assembly GRCh37.

Chr: Chromosome. DMR: differentially methylated region.

## Figure legends

**Figure 1. Manhattan and Q-Q plots of the breastfeeding EWAS, comparing peripheral blood methylation at age 7 between never vs. ever breastfed individuals.**

A,C: Manhattan plots. B,D: Q-Q plots. A,B: Minimally-adjusted model. C,D: Fully-adjusted model.

**Figure 2. Manhattan and Q-Q plots of the breastfeeding EWAS, comparing peripheral blood methylation at age 7 according to breastfeeding duration (in categories, assuming a linear trend).**

A,C: Manhattan plots. B,D: Q-Q plots. A,B: Minimally-adjusted model. C,D: Fully-adjusted model.

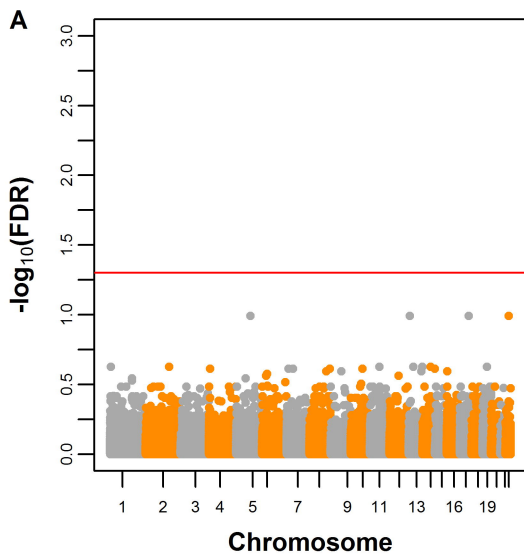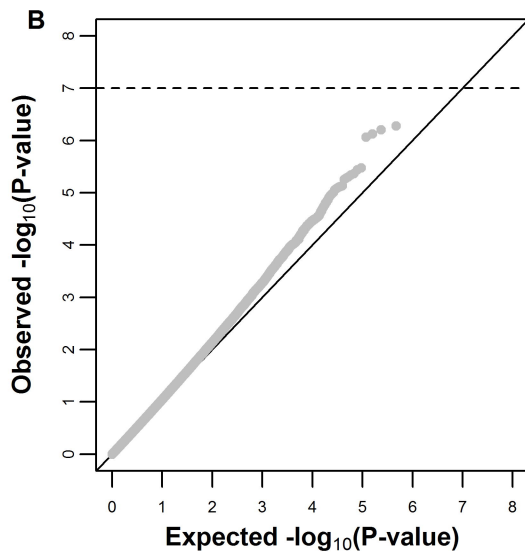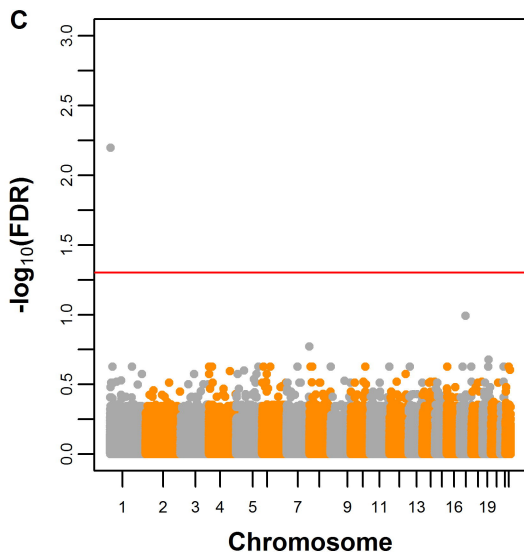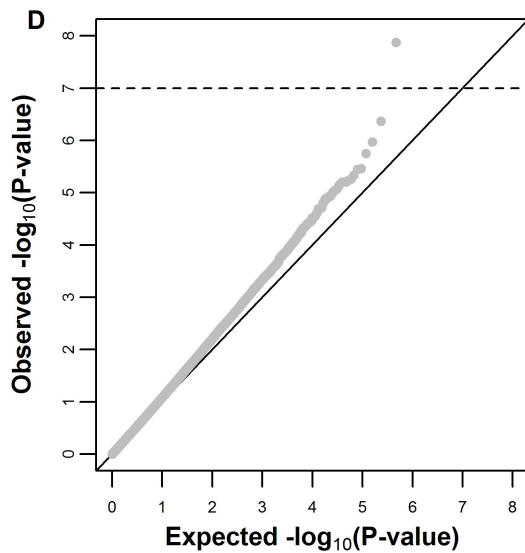



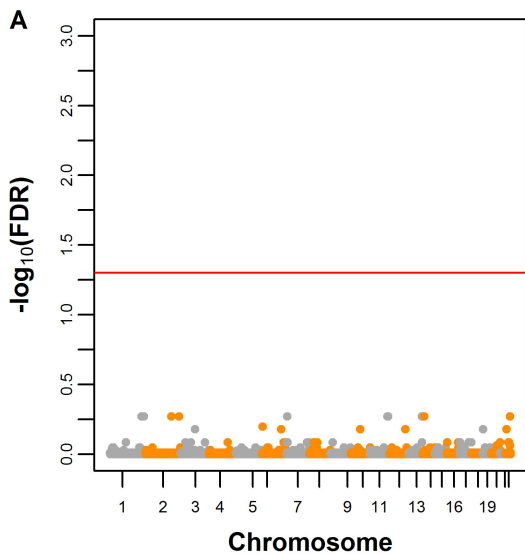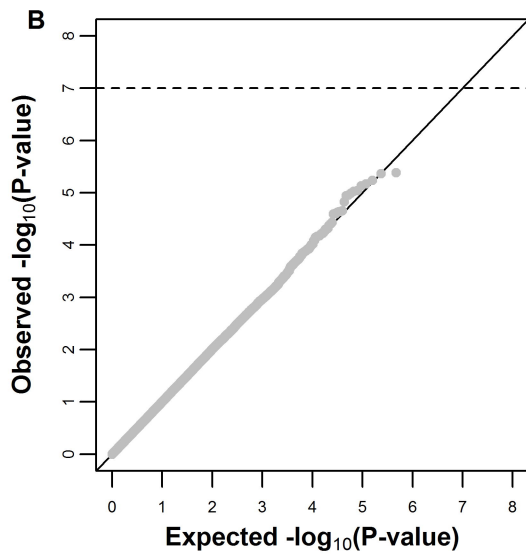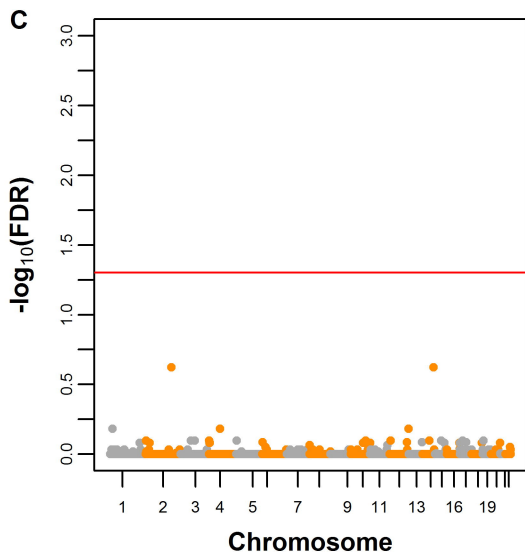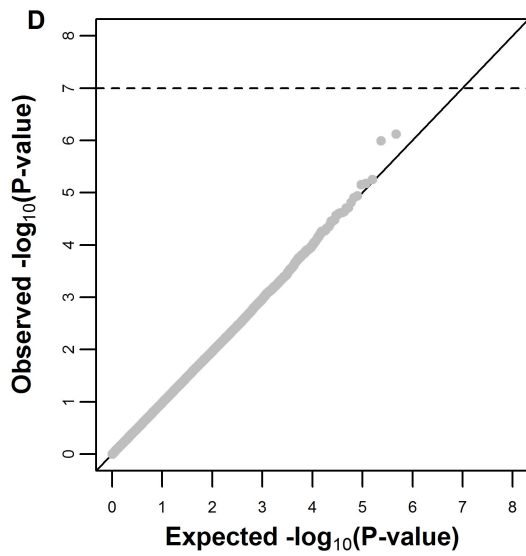

Source: https://www.biorxiv.org/content/biorxiv/early/2019/10/10/800722.full.pdf
